# Supplementary material
Source: publisher figshare collection journal article supplement (https://tandf.figshare.com/ndownloader/files/17086037)
Supplement: Supplementary file 1 [file 17086037]

Manuscript ID SPHY-2019-0073, entitled:

"See me, teach me, guide me, but it’s up to me!

Patients’ experiences of recovery during the acute phase after hip fracture

**Appendix 1**

**Interview guide**

**Introduction:** Can you tell me why you were admitted to hospital?

**Recovery:** Can you describe how you have experienced your recovery during hospital stay?

**Participation:** Can you describe your experiences of involvement/participation in your recovery process?

**TLS-BasicADL**: Show the patient their TLS-BasicADL protocol and ask them to describe what they know about the protocol.

Can you describe your experiences of the use of TLS-BasicADL in your daily care?
